# Supplementary material for: Reevaluating αE-catenin monomer and homodimer functions by characterizing E-cadherin/αE-catenin chimeras
Source: PubMed Central journal article supplement — J Cell Biol. 2015 Sep 28;210(7):1065–74. doi: 10.1083/jcb.201411080 (PMC4586751; doi:10.1083/jcb.201411080), 2015-09-28
Supplement: supp_jcb.201411080_JCB_201411080_sm.pdf [file supp_jcb.201411080_JCB_201411080_sm.pdf]

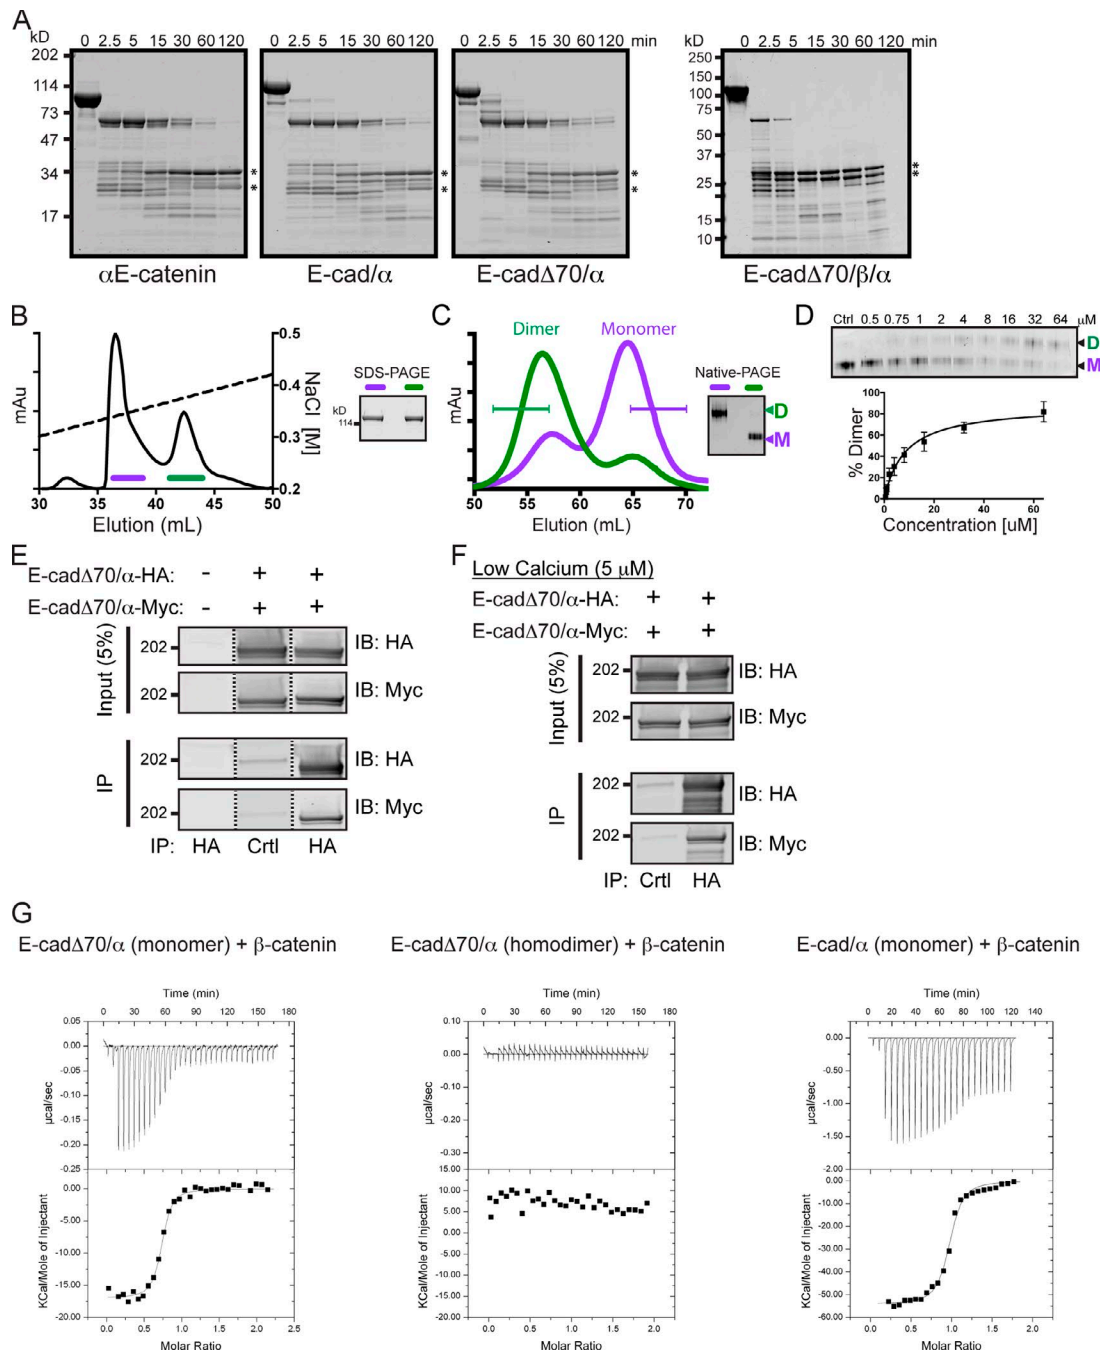

**Figure S1. In vitro characterization of E-cadherin/ $\alpha$ E-catenin chimeras.** (A) SDS-PAGE and CBB staining of  $\alpha$ E-catenin, E-cad/ $\alpha$ , E-cad $\Delta$ 70/ $\alpha$ , and E-cad $\Delta$ 70/ $\beta$ / $\alpha$  recombinant proteins incubated with 0.05 mg/ml trypsin. The E-cadherin cytoplasmic domain is unstructured and does not generate stable breakdown products. After 2 h, two major bands were resolved (\*) and correspond to the previously published M-domain (385–651) and dimerization domain (82–287; Drees et al., 2005a; Kwiatkowski et al., 2010; Miller et al., 2013). (B) IEC of recombinant E-cad/ $\alpha$  and SDS-PAGE and CBB staining of protein from the resulting two peaks (fractions indicated with purple and green lines). (C) SEC of E-cad/ $\alpha$  from the two IEC peaks. Fractions (indicated with brackets) were pooled and analyzed by Native-PAGE stained with CBB. (D) Native-PAGE and CBB staining of increasing concentrations of monomeric E-cad/ $\alpha$  chimera (0.5–64  $\mu$ M) that had been incubated for 16 h at 37°C. Quantification of the percentage of dimerization with standard deviation from three independent experiments is shown. (Ctrl.) Purified monomeric E-cad/ $\alpha$  that was kept at 4°C. (E) Coimmunoprecipitation of C-terminally HA- and Myc-tagged E-cad $\Delta$ 70/ $\alpha$  from HEK293T.  $n = 3$ . (F) Coimmunoprecipitation of C-terminally HA- and Myc-tagged E-cad $\Delta$ 70/ $\alpha$  was also observed when cells were cultured in low calcium medium (5  $\mu$ M).  $n = 3$ . (G) Isothermal titration calorimetry measurements conducted at 25°C in a HEPES buffer with a 10-fold molar excess of  $\beta$ -catenin titrated into a 6  $\mu$ M solution of either monomeric E-cad $\Delta$ 70/ $\alpha$ , homodimeric E-cad $\Delta$ 70/ $\alpha$ , or monomeric E-cad/ $\alpha$  by a series of 9  $\mu$ l injections with a 240 s delay between each injection. The thermodynamic parameters observed for the reactions are listed in Table 1.

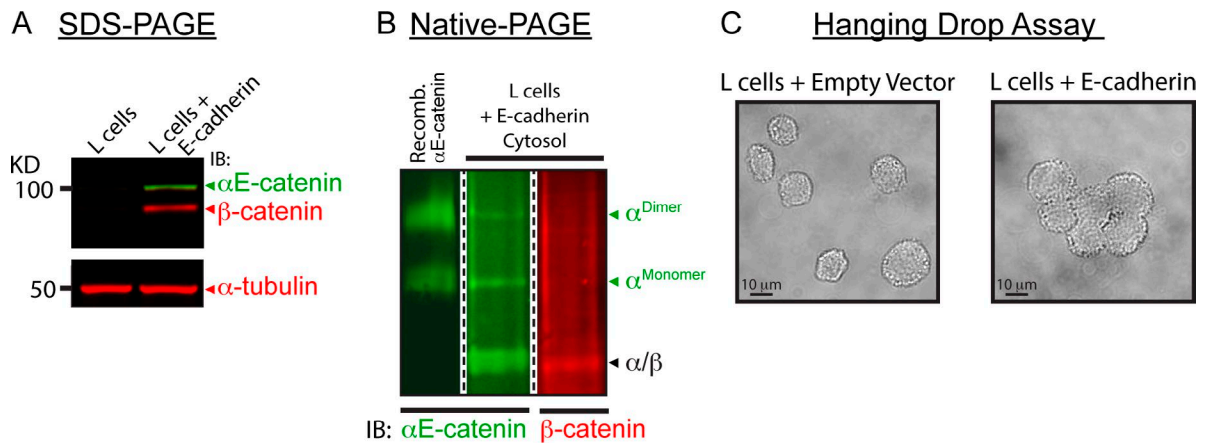

Figure S2. **Cytosolic expression of  $\alpha$ E-catenin in L cells, and hanging drop cell-cell adhesion assay.** (A) Total cell lysate of L cells and L cells upon dexamethasone-induced E-cadherin expression were run on SDS-PAGE and blotted for  $\alpha$ E-catenin and  $\beta$ -catenin.  $\alpha$ -Tubulin serves as a loading control. (B) Recombinant  $\alpha$ E-catenin homodimer and monomer and cytosol of L cells upon dexamethasone-induced E-cadherin expression were run on Native-PAGE and blotted for  $\alpha$ E-catenin and  $\beta$ -catenin. (C) Hanging drop assay of L cells expressing E-cadherin or an empty vector control are shown. Clusters with four or more cells with compacted membranes were counted in the hanging drop assay.
